# Supplementary material for: Meibum Lipidomic Analysis in Evaporative Dry Eye Subjects
Source: MDPI journal article supplement (doi:10.3390/ijms25094782), 2024-04-27
Supplement: s1 [file s1]

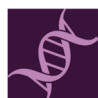

## Supplementary material

**Table S1.** List of lipids identified.

| #  | Name                   | m/z meas. | #  | Name                  | m/z meas. | #   | Name              | m/z meas.  |
|----|------------------------|-----------|----|-----------------------|-----------|-----|-------------------|------------|
| 1  | CE 16:0                | 642.61779 | 45 | HexCer 18:1;O2/16:0;O | 716.56683 | 89  | SPB 22:0;O2       | 358.36780  |
| 2  | CE 18:0                | 670.64845 | 46 | LPC 16:0              | 518.32194 | 90  | SPB 22:1;O2       | 356.35201  |
| 3  | CE 18:1                | 668.63326 | 47 | LPC 17:0-SN2          | 510.35643 | 91  | SPB 24:1;2O       | 384.38349  |
| 4  | CE 18:2                | 666.61731 | 48 | LPC 18:0              | 524.37067 | 92  | SPB 26:1;2O       | 412.41458  |
| 5  | CE 20:0                | 698.68031 | 49 | LPC 18:1              | 522.35503 | 93  | SPB 28:1;2O       | 440.44600  |
| 6  | CE 20:1                | 696.66490 | 50 | LPC 18:1-SN2          | 522.35506 | 94  | TG 10:0_10:0_18:1 | 682.59821  |
| 7  | CE 20:2                | 694.64854 | 51 | LPC 18:2              | 542.32069 | 95  | TG 10:0_18:2_18:2 | 788.67609  |
| 8  | CE 20:3                | 692.63231 | 52 | LPC 18:2-SN2          | 520.33932 | 96  | TG 12:0_12:0_18:1 | 738.65987  |
| 9  | CE 22:0                | 726.71054 | 53 | LPC 18:3              | 518.32348 | 97  | TG 12:0_14:0_16:0 | 740.67584  |
| 10 | CE 22:1                | 724.69596 | 54 | PC 12:0_24:4          | 782.56721 | 98  | TG 14:0_16:1_16:1 | 792.70603  |
| 11 | CE 22:2                | 722.68013 | 55 | PC 16:0_18:1          | 760.58498 | 99  | TG 14:1_16:0_16:1 | 792.70720  |
| 12 | CE 22:3                | 720.66402 | 56 | PC 25:0_13:1          | 816.64689 | 100 | TG 14:1_16:1_16:1 | 790.69107  |
| 13 | CE 24:0                | 754.74222 | 57 | PC 34:2               | 758.56917 | 101 | TG 14:1_16:1_18:1 | 818.72412  |
| 14 | CE 24:2                | 750.71262 | 58 | PC 34:3               | 756.55299 | 102 | TG 14:1_16:1_18:2 | 816.70674  |
| 15 | CE 24:3                | 748.69546 | 59 | PC 36:2               | 786.59924 | 103 | TG 15:0_16:1_16:1 | 806.72265  |
| 16 | CE 25:0                | 768.75799 | 60 | PC 36:3               | 784.58562 | 104 | TG 16:0_16:1_18:1 | 848.76939  |
| 17 | Cer 10:1;2O/28:7       | 580.47271 | 61 | PC 38:6               | 806.56875 | 105 | TG 16:0_16:1_18:2 | 846.75398  |
| 18 | Cer 16:1;O2/22:0       | 594.58172 | 62 | PC 42:2               | 870.69369 | 106 | TG 16:0_18:0_18:1 | 878.81781  |
| 19 | Cer 16:1;O3/20:0;O     | 598.53976 | 63 | PC O-16:0             | 496.33962 | 107 | TG 16:0_18:0_20:0 | 908.86270  |
| 20 | Cer 17:0;3O/23:0;(2OH) | 656.61755 | 64 | PC O-18:0             | 524.37042 | 108 | TG 16:0_18:1_18:1 | 876.80029  |
| 21 | Cer 18:0;O2/16:0       | 540.53541 | 65 | PC O-18:1             | 522.35520 | 109 | TG 16:1/16:1/16:1 | 818.72301  |
| 22 | Cer 18:1;2O/17:0       | 552.53474 | 66 | PC O-20:4             | 544.33958 | 110 | TG 16:1_16:1_18:1 | 846.75433  |
| 23 | Cer 18:1;O2/16:0       | 538.51887 | 67 | PC O-36:1             | 774.63792 | 111 | TG 16:1_17:1_17:1 | 846.75413  |
| 24 | Cer 18:1;O3/20:0;O     | 626.57075 | 68 | PC O-36:2             | 772.62063 | 112 | TG 16:1_17:1_18:1 | 860.76978  |
| 25 | Cer 18:2;O2/16:0       | 536.50321 | 69 | PE 36:1               | 746.57042 | 113 | TG 16:1_18:1_18:1 | 874.78702  |
| 26 | Cer 19:0;2O/17:2       | 564.53485 | 70 | PE 36:2               | 744.55386 | 114 | TG 16:1_18:1_20:1 | 902.81661  |
| 27 | Cer 19:0;2O/18:2       | 578.55056 | 71 | PG 18:1/18:1          | 792.57411 | 115 | TG 17:0_18:1_18:1 | 890.81769  |
| 28 | Cer 19:0;2O/19:2       | 592.56543 | 72 | PG 18:1_20:3          | 816.57395 | 116 | TG 17:1_18:1_18:1 | 888.80164  |
| 29 | Cer 19:0;3O/17:0;(2OH) | 600.55552 | 73 | PI 38:4               | 904.59121 | 117 | TG 18:0_18:1_18:2 | 902.81594  |
| 30 | Cer 23:0;3O/16:0;(2OH) | 642.60216 | 74 | SM 30:1;2O/10:0       | 787.66865 | 118 | TG 18:0_22:0_22:0 | 1020.98920 |
| 31 | Cer 34:2;2O/2:0        | 564.53575 | 75 | SM 32:1;O2            | 675.54215 | 119 | TG 18:1_18:1_19:1 | 916.83227  |
| 32 | DG 14:0_16:0           | 558.50797 | 76 | SM 34:1;2O/6:0        | 787.66890 | 120 | TG 18:1_18:1_20:0 | 932.86403  |
| 33 | DG 14:0_18:1           | 584.52458 | 77 | SM 34:1;O2            | 703.57503 | 121 | TG 18:1_18:1_20:1 | 930.84925  |
| 34 | DG 16:1/16:1           | 582.50913 | 78 | SM 34:1;O3            | 719.57032 | 122 | TG 18:1_18:1_20:3 | 926.81572  |
| 35 | DG 16:1_17:1           | 596.52407 | 79 | SM 42:1;O3            | 831.69454 | 123 | TG 18:1_18:1_25:0 | 1002.94099 |
| 36 | DG 16:1_18:1           | 610.53999 | 80 | SM 44:0;3O            | 861.74110 | 124 | TG 18:1_20:3_20:3 | 950.81649  |

|    |                |           |    |             |           |     |                  |           |
|----|----------------|-----------|----|-------------|-----------|-----|------------------|-----------|
| 37 | DG 16:1_18:2   | 608.52618 | 81 | SM 44:0;O2  | 845.74552 | 125 | TG 8:0_10:0_15:0 | 614.53480 |
| 38 | DG 18:1/18:1   | 638.57153 | 82 | SM 44:1;O2  | 843.73203 | 126 | TG 8:0_12:0_12:0 | 600.51968 |
| 39 | DG 18:1_18:2   | 636.55594 | 83 | SM 45:0;3O  | 875.75744 | 127 | TG 8:0_18:1_18:1 | 764.67536 |
| 40 | DG 18:1_20:3   | 662.57186 | 84 | SPB 18:0;3O | 318.30001 | 128 | TG 8:0_18:1_18:2 | 762.65979 |
| 41 | DG 18:2/18:2   | 634.54025 | 85 | SPB 19:0;3O | 332.31586 | 129 | TG 8:0_8:0_10:0  | 516.42566 |
| 42 | DG O-19:0_16:1 | 612.59151 | 86 | SPB 20:0;2O | 330.33652 | 130 | TG 8:0_8:0_16:1  | 598.50405 |
| 43 | DG O-23:0_18:1 | 696.68522 | 87 | SPB 20:0;O3 | 346.33141 | 131 | TG 9:0_9:0_9:0   | 530.44130 |
| 44 | DG O-38:5      | 646.57755 | 88 | SPB 21:0;2O | 344.35174 |     |                  |           |

**Table S2.** Total scores for each characteristic studied. The LLP score is the assigned according to Gillon's scheme. Eyelid margin abnormalities and morphological features of the MG, such as hyperemia, MG orifice plugging, irregularity, MG loss, MG drop out and partial glands, are expressed as the sum scores for both eyelids in each sample. ID: identity; LLP: Lipid Layer Pattern; MG: Meibomian Gland.

| Sample ID | LLP | Eyelid Margin Hyperemia | MG Orifice Plugging | Eyelid Margin Irregularity | Eyelid Margin Thickening | MG Loss | MG Drop Out | Partial Glands |
|-----------|-----|-------------------------|---------------------|----------------------------|--------------------------|---------|-------------|----------------|
| 1         | 5   | 5                       | 4                   | 1                          | 2                        | 2       | 1           | 4              |
| 2         | 4   | 4                       | 4                   | 1                          | 0                        | 2       | 2           | 4              |
| 3         | 4   | 2                       | 1                   | 2                          | 2                        | 3       | 1           | 6              |
| 4         | 4   | 4                       | 3                   | 4                          | 4                        | 3       | 0           | 5              |
| 5         | 3   | 5                       | 4                   | 3                          | 1                        | 3       | 0           | 5              |
| 6         | 3   | 4                       | 3                   | 3                          | 2                        | 4       | 1           | 5              |
| 7         | 4   | 5                       | 0                   | 2                          | 2                        | 1       | 0           | 2              |
| 8         | 3   | 4                       | 1                   | 1                          | 0                        | 0       | 1           | 2              |
| 9         | 4   | 1                       | 1                   | 0                          | 0                        | 0       | 0           | 2              |
| 10        | 5   | 3                       | 1                   | 0                          | 0                        | 0       | 0           | 2              |
| 11        | 4   | 1                       | 0                   | 0                          | 0                        | 3       | 1           | 3              |
| 12        | 4   | 1                       | 1                   | 0                          | 0                        | 3       | 1           | 4              |
| 13        | 4   | 5                       | 4                   | 1                          | 3                        | 4       | 3           | 6              |
| 14        | 3   | 5                       | 2                   | 2                          | 2                        | 5       | 3           | 6              |
| 15        | 5   | 4                       | 1                   | 0                          | 0                        | 3       | 1           | 5              |
| 16        | 4   | 5                       | 1                   | 1                          | 0                        | 2       | 1           | 4              |
| 17        | 4   | 3                       | 6                   | 1                          | 0                        | 3       | 4           | 6              |
| 18        | 5   | 5                       | 6                   | 2                          | 0                        | 5       | 4           | 6              |
| 19        | 5   | 5                       | 2                   | 2                          | 2                        | 2       | 0           | 3              |
| 20        | 5   | 4                       | 2                   | 2                          | 1                        | 3       | 0           | 3              |
| 21        | 4   | 4                       | 2                   | 0                          | 0                        | 3       | 0           | 5              |
| 22        | 5   | 4                       | 2                   | 1                          | 1                        | 2       | 0           | 4              |
| 23        | 4   | 3                       | 2                   | 0                          | 0                        | 2       | 0           | 1              |
| 24        | 4   | 3                       | 1                   | 1                          | 0                        | 1       | 0           | 1              |
| 25        | 4   | 5                       | 0                   | 1                          | 2                        | 2       | 0           | 5              |

---

|    |   |   |   |   |   |   |   |   |
|----|---|---|---|---|---|---|---|---|
| 26 | 4 | 3 | 2 | 1 | 2 | 2 | 0 | 4 |
| 27 | 4 | 0 | 0 | 0 | 0 | 2 | 2 | 3 |
| 28 | 4 | 0 | 0 | 0 | 0 | 1 | 2 | 2 |
| 29 | 1 | 2 | 2 | 0 | 0 | 0 | 1 | 2 |
| 30 | 3 | 3 | 2 | 2 | 2 | 1 | 0 | 3 |
| 31 | 4 | 3 | 1 | 1 | 2 | 1 | 0 | 3 |
| 32 | 5 | 2 | 1 | 2 | 1 | 2 | 0 | 4 |
| 33 | 3 | 2 | 1 | 1 | 0 | 2 | 0 | 4 |
| 34 | 2 | 3 | 1 | 0 | 0 | 2 | 0 | 2 |
| 35 | 2 | 3 | 3 | 0 | 2 | 2 | 0 | 2 |
| 36 | 4 | 5 | 2 | 1 | 2 | 0 | 1 | 2 |
| 37 | 4 | 5 | 2 | 1 | 1 | 0 | 0 | 0 |
| 38 | 4 | 2 | 1 | 1 | 0 | 0 | 0 | 0 |
| 39 | 4 | 3 | 2 | 1 | 1 | 1 | 1 | 0 |
| 40 | 4 | 4 | 2 | 0 | 0 | 3 | 0 | 4 |
| 41 | 4 | 3 | 2 | 0 | 0 | 2 | 0 | 3 |
| 42 | 4 | 4 | 0 | 1 | 0 | 1 | 0 | 2 |
| 43 | 2 | 4 | 3 | 2 | 2 | 5 | 3 | 6 |
| 44 | 4 | 5 | 1 | 1 | 0 | 3 | 2 | 4 |

---

11

12

13
